# Supplementary material
Source: PubMed Central journal article supplement (PMC8035224)
Supplement: NIHMS1658494-supplement-1.pdf [file NIHMS1658494-supplement-1.pdf]

**Supplemental Table 1.** Population Characteristics, by Regular Use of Ranitidine and Omeprazole

|                                                       | <b>Total</b>        | <b>Regular Ranitidine Use</b> |                           | <b>Regular Omeprazole Use</b> |                            |
|-------------------------------------------------------|---------------------|-------------------------------|---------------------------|-------------------------------|----------------------------|
|                                                       | N= 459,204<br>N (%) | No<br>N= 450,360<br>(98.1%)   | Yes<br>N= 8,844<br>(1.9%) | No<br>N= 432,245<br>(94.1%)   | Yes<br>N= 26,959<br>(5.9%) |
| <b>Age<sup>a</sup></b>                                |                     |                               |                           |                               |                            |
| < 50                                                  | 111,021 (24.2)      | 109,201 (98.4)                | 1,820 (1.6)               | 107,597 (96.9)                | 3,424 (3.1)                |
| 50-60                                                 | 154,284 (33.6)      | 151,433 (98.2)                | 2,851 (1.9)               | 146,399 (94.9)                | 7,885 (5.1)                |
| 60-70                                                 | 191,801 (41.8)      | 187,685 (97.9)                | 4,116 (2.2)               | 176,374 (92.0)                | 15,427 (8.0)               |
| ≥ 70                                                  | 2,098 (0.5)         | 2,041 (97.3)                  | 57 (2.7)                  | 1,875 (89.4)                  | 223 (10.6)                 |
| <b>Sex</b>                                            |                     |                               |                           |                               |                            |
| Female                                                | 248,338 (54.1)      | 243,540 (98.1)                | 4,798 (1.9)               | 232,988 (93.8)                | 15,350 (6.2)               |
| Male                                                  | 210,866 (45.9)      | 206,820 (98.1)                | 4,046 (1.9)               | 199,257 (94.5)                | 11,609 (5.5)               |
| <b>Race</b>                                           |                     |                               |                           |                               |                            |
| White                                                 | 433,602 (94.4)      | 425,620 (98.1)                | 8,342 (1.9)               | 408,150 (94.1)                | 25,452 (5.9)               |
| Non-white                                             | 25,602 (5.6)        | 25,100 (98.0)                 | 502 (2.0)                 | 24,095 (94.1)                 | 1,507 (5.9)                |
| <b>Household Income (£)</b>                           |                     |                               |                           |                               |                            |
| < 18,000                                              | 87,290 (19.0)       | 84,950 (97.3)                 | 2,340 (2.7)               | 79,512 (91.1)                 | 7,778 (8.9)                |
| 18,000 to 30,999                                      | 99,687 (21.7)       | 97,839 (98.2)                 | 1,848 (1.9)               | 93,528 (93.8)                 | 6,159 (6.2)                |
| 31,000 to 51,999                                      | 104,003 (22.6)      | 102,297 (98.4)                | 1,706 (1.6)               | 99,249 (95.4)                 | 4,754 (4.6)                |
| 52,000 to 100,000                                     | 81,983 (17.9)       | 80,716 (98.5)                 | 1,267 (1.6)               | 79,127 (96.5)                 | 2,856 (3.5)                |
| > 100,000                                             | 21,867 (4.8)        | 21,549 (98.6)                 | 318 (1.5)                 | 21,138 (96.7)                 | 729 (3.3)                  |
| Missing                                               | 64,374 (14.0)       | 63,009 (97.9)                 | 1,365 (2.1)               | 59,691 (92.7)                 | 4,683 (7.3)                |
| <b>BMI (kg/m<sup>2</sup>)<sup>b</sup></b>             |                     |                               |                           |                               |                            |
| < 25                                                  | 152,339 (33.2)      | 150,439 (98.8)                | 1,900 (1.3)               | 146,946 (96.5)                | 5,393 (3.5)                |
| 25 - <30                                              | 195,394 (42.6)      | 191,641 (98.1)                | 3,753 (1.9)               | 183,799 (94.1)                | 11,595 (5.9)               |
| 30 - <35                                              | 79,987 (17.4)       | 77,843 (97.3)                 | 2,144 (2.7)               | 73,223 (91.5)                 | 6,764 (8.5)                |
| ≥ 35                                                  | 31,484 (6.9)        | 30,437 (96.7)                 | 1,047 (3.3)               | 28,277 (89.8)                 | 3,207 (10.2)               |
| <b>Smoking Status</b>                                 |                     |                               |                           |                               |                            |
| Never                                                 | 252,663 (55.0)      | 248,663 (98.4)                | 4,000 (1.6)               | 239,888 (94.9)                | 12,775 (5.1)               |
| Former                                                | 158,082 (34.4)      | 154,542 (97.8)                | 3,540 (2.2)               | 146,900 (92.9)                | 11,182 (7.1)               |
| Current                                               | 48,459 (10.6)       | 47,155 (97.3)                 | 1,304 (2.7)               | 45,457 (93.8)                 | 3,002 (6.2)                |
| <b>Packyears (tertiles among smokers)<sup>c</sup></b> |                     |                               |                           |                               |                            |
| 0/Non-smokers                                         | 320,758 (69.9)      | 315,467 (98.4)                | 5,291 (1.7)               | 304,036 (94.8)                | 16,722 (5.2)               |
| Tertile 1                                             | 46,293 (10.1)       | 45,372 (98.0)                 | 921 (2.0)                 | 43,772 (94.6)                 | 2,521 (5.5)                |
| Tertile 2                                             | 45,227 (9.8)        | 44,085 (97.5)                 | 1,142 (2.5)               | 41,913 (92.7)                 | 3,314 (7.3)                |
| Tertile 3                                             | 46,926 (10.2)       | 45,436 (96.8)                 | 1,490 (3.2)               | 42,524 (90.6)                 | 4,402 (9.4)                |
| <b>Alcohol Intake</b>                                 |                     |                               |                           |                               |                            |
| Never                                                 | 36,062 (7.9)        | 35,106 (97.4)                 | 956 (2.7)                 | 32,801 (91.0)                 | 3,261 (9.0)                |
| Special occasions only                                | 52,258 (11.4)       | 51,098 (97.8)                 | 1,160 (2.2)               | 48,076 (92.0)                 | 4,182 (8.0)                |
| One to three times a month                            | 51,295 (11.2)       | 50,270 (98.0)                 | 1,025 (2.0)               | 48,211 (94.0)                 | 3,084 (6.0)                |
| Once to four times a week                             | 225,740 (49.2)      | 221,805 (98.3)                | 3,935 (1.7)               | 214,145 (94.9)                | 11,595 (5.1)               |
| Daily or almost daily                                 | 93,849 (20.4)       | 92,081 (98.1)                 | 1,768 (1.9)               | 89,012 (94.9)                 | 4,837 (5.2)                |
| <b>Physical Activity</b>                              |                     |                               |                           |                               |                            |
| None                                                  | 47,582 (10.4)       | 46,344 (97.4)                 | 1,238 (2.6)               | 43,644 (91.7)                 | 3,938 (8.3)                |
| Any moderate                                          | 105,533 (23.0)      | 103,267 (97.9)                | 2,266 (2.2)               | 98,288 (93.1)                 | 7,245 (6.9)                |
| Any vigorous                                          | 275,171 (59.9)      | 270,728 (98.4)                | 4,443 (1.6)               | 262,179 (95.3)                | 12,992 (4.7)               |
| Missing                                               | 30,918 (6.7)        | 30,021 (97.1)                 | 897 (2.9)                 | 28,134 (91.0)                 | 2,784 (9.0)                |
| <b>Diabetes</b>                                       |                     |                               |                           |                               |                            |
| No                                                    | 435,598 (94.9)      | 427,504 (98.1)                | 8,094 (1.9)               | 411,276 (94.4)                | 24,322 (5.6)               |
| Yes                                                   | 23,606 (5.1)        | 22,856 (96.8)                 | 750 (3.2)                 | 20,969 (88.8)                 | 2,637 (11.2)               |
| <b>Colorectal Cancer Specific</b>                     |                     |                               |                           |                               |                            |

| Variables                                              |                |                |             |                |              |
|--------------------------------------------------------|----------------|----------------|-------------|----------------|--------------|
| <b>History of Bowel Screening</b>                      |                |                |             |                |              |
| No                                                     | 313,090 (68.2) | 307,872 (98.3) | 5,218 (1.7) | 299,213 (95.6) | 13,877 (4.4) |
| Yes                                                    | 138,810 (30.2) | 135,364 (97.5) | 3,446 (2.5) | 126,299 (91.0) | 12,511 (9.0) |
| Missing                                                | 7,304 (1.6)    | 7,124 (97.5)   | 180 (2.5)   | 6,733 (92.2)   | 571 (7.8)    |
| <b>Aspirin Use</b>                                     |                |                |             |                |              |
| No                                                     | 395,051 (86.0) | 388,012 (98.2) | 7,039 (1.8) | 374,490 (94.8) | 20,561 (5.2) |
| Yes                                                    | 64,153 (14.0)  | 62,348 (97.2)  | 1,805 (2.8) | 57,755 (90.0)  | 6,398 (10.0) |
| <b>Non-aspirin NSAID Use</b>                           |                |                |             |                |              |
| No                                                     | 390,072 (84.9) | 383,143 (98.2) | 6,929 (1.8) | 366,583 (94.0) | 23,489 (6.0) |
| Yes                                                    | 69,132 (15.1)  | 67,217 (97.2)  | 1,915 (2.8) | 65,662 (95.0)  | 3,470 (5.0)  |
| <b>Menopause Status/PMH Use<sup>d</sup></b>            |                |                |             |                |              |
| Pre-menopausal                                         | 61,631 (24.8)  | 60,754 (98.6)  | 877 (1.4)   | 59,892 (97.2)  | 1,739 (2.8)  |
| Post-menopausal w/o PMH Use                            | 83,861 (33.8)  | 82,561 (98.5)  | 1,300 (1.6) | 79,588 (94.9)  | 4,273 (5.1)  |
| Post-menopausal w/ PMH Use                             | 88,001 (35.4)  | 85,678 (97.4)  | 2,323 (2.6) | 79,485 (90.3)  | 8,516 (9.7)  |
| Missing                                                | 14,845 (6.0)   | 14,547 (98.0)  | 298 (2.0)   | 14,023 (94.5)  | 822 (5.5)    |
| <b>Fruit Intake (servings per day)<sup>e</sup></b>     |                |                |             |                |              |
| 0-<2                                                   | 149,508 (32.6) | 146,253 (97.8) | 3,255 (2.2) | 140,877 (94.2) | 8,631 (5.8)  |
| 2-<3                                                   | 115,243 (25.1) | 113,210 (98.2) | 2,033 (1.8) | 108,889 (94.5) | 6,354 (5.5)  |
| 3-<4                                                   | 87,999 (19.2)  | 86,408 (98.2)  | 1,591 (1.8) | 82,781 (94.1)  | 5,218 (5.9)  |
| ≥4                                                     | 100,630 (21.9) | 98,819 (98.2)  | 1,811 (1.8) | 94,335 (93.7)  | 6,295 (6.3)  |
| Missing                                                | 5,824 (1.3)    | 5,670 (97.4)   | 154 (2.6)   | 5,636 (92.1)   | 461 (7.9)    |
| <b>Vegetable Intake (servings per day)<sup>f</sup></b> |                |                |             |                |              |
| 0-<2                                                   | 156,197 (34.0) | 152,981 (97.9) | 3,216 (2.1) | 146,839 (94.0) | 9,358 (6.0)  |
| 2-<3                                                   | 152,665 (33.2) | 149,870 (98.2) | 2,795 (1.8) | 144,019 (94.3) | 8,646 (5.7)  |
| 3-<4                                                   | 80,189 (17.5)  | 78,720 (98.2)  | 1,469 (1.8) | 75,509 (94.2)  | 4,680 (5.8)  |
| ≥4                                                     | 61,858 (13.5)  | 60,702 (98.1)  | 1,156 (1.9) | 58,247 (94.2)  | 3,611 (5.8)  |
| Missing                                                | 8,295 (1.8)    | 8,087 (97.5)   | 208 (2.5)   | 7,631 (92.0)   | 664 (8.0)    |
| <b>Processed Meat (times/wk)<sup>g</sup></b>           |                |                |             |                |              |
| Never                                                  | 42,544 (9.3)   | 41,861 (98.4)  | 683 (1.6)   | 40,286 (94.7)  | 2,258 (5.3)  |
| <1                                                     | 139,495 (30.4) | 136,980 (98.2) | 2,515 (1.8) | 131,200 (94.1) | 8,295 (5.9)  |
| 1                                                      | 133,837 (29.1) | 131,209 (98.0) | 2,628 (2.0) | 125,956 (94.1) | 7,881 (5.9)  |
| ≥2                                                     | 142,441 (21.0) | 139,448 (97.9) | 2,993 (2.1) | 133,999 (94.1) | 8,442 (5.9)  |
| Missing                                                | 887 (0.2)      | 862 (97.2)     | 25 (2.8)    | 804 (90.6)     | 83 (9.4)     |
| <b>Red Meat Intake (times/wk)<sup>h</sup></b>          |                |                |             |                |              |
| 0 - <1                                                 | 46,115 (10.0)  | 45,377 (98.4)  | 738 (1.6)   | 43,869 (95.1)  | 2,246 (4.9)  |
| 1-<2                                                   | 179,492 (39.1) | 176,275 (98.2) | 3,217 (1.8) | 169,224 (94.3) | 10,268 (5.7) |
| 2-<3                                                   | 127,684 (27.8) | 125,254 (98.1) | 2,430 (1.9) | 120,166 (94.1) | 7,518 (5.9)  |
| ≥3                                                     | 101,040 (22.0) | 98,715 (97.7)  | 2,325 (2.3) | 94,487 (93.5)  | 6,553 (6.5)  |
| Missing                                                | 4,873 (1.1)    | 4,739 (97.3)   | 134 (2.8)   | 4,499 (92.3)   | 374 (7.7)    |
| <b>Lung Cancer-Specific Variables</b>                  |                |                |             |                |              |
| <b>Any pre-existing lung disease</b>                   |                |                |             |                |              |
| No                                                     | 451,397 (98.3) | 442,882 (98.1) | 8,515 (1.9) | 425,568 (94.3) | 25,829 (5.7) |
| Yes                                                    | 7,807 (1.7)    | 7,478 (95.8)   | 329 (4.2)   | 6,677 (85.5)   | 1,130 (14.5) |
| <b>Breast Cancer Specific Variables<sup>d</sup></b>    |                |                |             |                |              |
| <b>History of Screening/mammogram</b>                  |                |                |             |                |              |
| No                                                     | 52,450 (21.1)  | 51,646 (98.5)  | 804 (1.5)   | 50,854 (97.0)  | 1,596 (3.0)  |

|                                                       |                |                |             |                |              |
|-------------------------------------------------------|----------------|----------------|-------------|----------------|--------------|
| Yes                                                   | 195,535 (78.7) | 191,546 (98.0) | 3,989 (2.0) | 181,793 (93.0) | 13,742 (7.0) |
| Missing                                               | 353 (0.1)      | 348 (98.6)     | 5 (1.4)     | 341 (96.6)     | 12 (3.4)     |
| <b>Age at Menarche<sup>i</sup></b>                    |                |                |             |                |              |
| < 11                                                  | 11,095 (4.5)   | 10,827 (97.6)  | 268 (2.4)   | 10,235 (92.3)  | 860 (7.8)    |
| 11-12                                                 | 82,482 (33.2)  | 80,799 (98.0)  | 1,683 (2.0) | 77,035 (93.4)  | 5,447 (6.6)  |
| 13-15                                                 | 133,214 (53.6) | 130,782 (98.2) | 2,432 (1.8) | 125,456 (94.2) | 7,758 (5.8)  |
| ≥16                                                   | 14,191 (5.7)   | 13,888 (97.9)  | 303 (2.1)   | 13,299 (93.7)  | 892 (6.3)    |
| Missing                                               | 7,356 (3.0)    | 7,244 (98.5)   | 112 (1.5)   | 6,963 (94.7)   | 393 (5.3)    |
| <b>Parity<sup>j</sup></b>                             |                |                |             |                |              |
| 0                                                     | 46,480 (18.7)  | 45,590 (98.1)  | 890 (1.9)   | 44,077 (94.8)  | 2,403 (5.2)  |
| 1-2                                                   | 141,812 (57.1) | 139,165 (98.1) | 2,647 (1.9) | 133,211 (93.9) | 8,601 (6.1)  |
| ≥3                                                    | 59,839 (24.1)  | 58,586 (97.9)  | 1,253 (2.1) | 55,509 (92.8)  | 4,330 (7.2)  |
| Missing                                               | 207 (0.1)      | 199 (96.1)     | 8 (3.9)     | 191 (92.3)     | 16 (7.7)     |
| <b>Menopause Status/PMH Use<sup>d</sup></b>           |                |                |             |                |              |
| Pre-menopausal                                        | 61,631 (24.8)  | 60,754 (98.6)  | 877 (1.4)   | 59,892 (97.2)  | 1,739 (2.8)  |
| Post-menopausal w/o PMH Use                           | 83,861 (33.8)  | 82,561 (98.5)  | 1,300 (1.6) | 79,588 (94.9)  | 4,273 (5.1)  |
| Post-menopausal w/ PMH Use                            | 88,001 (35.4)  | 85,678 (97.4)  | 2,323 (2.6) | 79,485 (90.3)  | 8,516 (9.7)  |
| Missing                                               | 14,845 (6.0)   | 14,547 (98.0)  | 298 (2.0)   | 14,023 (94.5)  | 822 (5.5)    |
| <b>Prostate Cancer Specific Variables<sup>k</sup></b> |                |                |             |                |              |
| <b>Prostate Specific Antigen Screening</b>            |                |                |             |                |              |
| No                                                    | 141,259 (67.0) | 138,677 (98.2) | 2,582 (1.8) | 134,810 (95.4) | 6,449 (4.6)  |
| Yes                                                   | 58,721 (27.8)  | 57,518 (98.0)  | 1,203 (2.1) | 54,432 (92.7)  | 4,289 (7.3)  |
| Missing                                               | 10,886 (5.2)   | 10,625 (97.6)  | 261 (2.4)   | 10,015 (92.0)  | 871 (8.0)    |
| <b>Liver Cancer Specific Variables</b>                |                |                |             |                |              |
| <b>Any pre-existing liver disease</b>                 |                |                |             |                |              |
| No                                                    | 456,962 (99.5) | 448,167 (98.1) | 8,795 (1.9) | 430,218 (94.2) | 26,744 (5.9) |
| Yes                                                   | 2,242 (0.5)    | 2,193 (97.8)   | 49 (2.2)    | 2,027 (90.4)   | 215 (9.6)    |
| <b>Kidney Cancer Specific Variables</b>               |                |                |             |                |              |
| <b>Non-aspirin NSAID Use</b>                          |                |                |             |                |              |
| No                                                    | 390,072 (84.9) | 383,143 (98.2) | 6,929 (1.8) | 366,583 (94.0) | 23,489 (6.0) |
| Yes                                                   | 69,132 (15.1)  | 67,217 (97.2)  | 1,915 (2.8) | 65,662 (95.0)  | 3,470 (5.0)  |
| <b>Hypertension</b>                                   |                |                |             |                |              |
| No                                                    | 334,793 (72.9) | 329,212 (98.3) | 5,581 (1.7) | 319,177 (95.3) | 15,616 (4.7) |
| Yes - unmedicated                                     | 34,822 (7.6)   | 34,054 (97.8)  | 768 (2.2)   | 32,591 (93.6)  | 2,231 (6.4)  |
| Yes - medicated                                       | 89,589 (19.5)  | 87,094 (97.2)  | 2,495 (2.8) | 80,477 (89.8)  | 9,112 (10.2) |
| <b>Ovarian Cancer Specific Variables<sup>d</sup></b>  |                |                |             |                |              |
| <b>Oral Contraceptive Use</b>                         |                |                |             |                |              |
| No                                                    | 45,787 (18.4)  | 44,822 (97.9)  | 965 (2.1)   | 42,268 (92.3)  | 3,519 (7.7)  |
| Yes                                                   | 201,901 (81.3) | 198,092 (98.1) | 3,809 (1.9) | 190,122 (94.2) | 11,779 (5.8) |
| Missing                                               | 650 (0.3)      | 626 (96.3)     | 24 (3.7)    | 598 (92.0)     | 52 (8.0)     |
| <b>History of tubal ligation</b>                      |                |                |             |                |              |
| No                                                    | 228,634 (92.1) | 224,344 (98.1) | 4,290 (1.9) | 215,059 (94.1) | 13,575 (5.9) |
| Yes                                                   | 19,704 (7.9)   | 19,196 (97.4)  | 508 (2.6)   | 17,929 (91.0)  | 1,775 (9.0)  |
| <b>History of Hysterectomy</b>                        |                |                |             |                |              |
| No                                                    | 203,591 (82.0) | 200,088 (98.3) | 3,503 (1.7) | 192,971 (94.8) | 10,620 (5.2) |
| Yes                                                   | 44,747 (18.0)  | 43,452 (97.1)  | 1,295 (2.9) | 40,017 (89.4)  | 4,730 (10.6) |
| <b>Parity<sup>j</sup></b>                             |                |                |             |                |              |
| 0                                                     | 46,480 (18.7)  | 45,590 (98.1)  | 890 (1.9)   | 44,077 (94.8)  | 2,403 (5.2)  |
| 1-2                                                   | 141,812 (57.1) | 139,165 (98.1) | 2,647 (1.9) | 133,211 (93.9) | 8,601 (6.1)  |

|                                       |               |               |             |               |             |
|---------------------------------------|---------------|---------------|-------------|---------------|-------------|
| ≥3                                    | 59,839 (24.1) | 58,586 (97.9) | 1,253 (2.1) | 55,509 (92.8) | 4,330 (7.2) |
| Missing                               | 207 (0.1)     | 199 (96.1)    | 8 (3.9)     | 191 (92.3)    | 16 (7.7)    |
| Menopause Status/PMH Use <sup>d</sup> |               |               |             |               |             |
| Pre-menopausal                        | 61,631 (24.8) | 60,754 (98.6) | 877 (1.4)   | 59,892 (97.2) | 1,739 (2.8) |
| Post-menopausal w/o PMH Use           | 83,861 (33.8) | 82,561 (98.5) | 1,300 (1.6) | 79,588 (94.9) | 4,273 (5.1) |
| Post-menopausal w/ PMH Use            | 88,001 (35.4) | 85,678 (97.4) | 2,323 (2.6) | 79,485 (90.3) | 8,516 (9.7) |
| Missing                               | 14,845 (6.0)  | 14,547 (98.0) | 298 (2.0)   | 14,023 (94.5) | 822 (5.5)   |

ABBREVIATIONS: BMI (Body mass index); PMH (Post-menopausal hormone)

<sup>a</sup> Percentages in these columns reflect row percentages (for example, 2.7% of adults ages 70+ year of age report use of ranitidine, as compared to 1.6% of adults <50 years of age)

<sup>b</sup> Age range for <50: 38 - 49; age range for ≥70: 70-73

<sup>c</sup> BMI range for <25: 12.1 - 24.9; BMI range for ≥35: 35-74.7

<sup>d</sup> Tertile 1 (0.05 - 12.5); Tertile 2 (>12.5- 26.3); Tertile 3 (>26.3- 301.0)

<sup>e</sup> Descriptive statistics calculated only in women

<sup>f</sup> Fruit intake category ≥4: 4-65

<sup>g</sup> Vegetable intake category ≥4: 4-50

<sup>h</sup> Processed meat category ≥2: 2/week- ≥1/day

<sup>i</sup> Red meat category ≥3: 3-21

<sup>j</sup> Age menarche range <11: 5-10; ≥16: 16-25

<sup>k</sup> Parity range ≥3: 3-22

<sup>l</sup> Descriptive statistics calculated only in men

**Supplemental Table 2. Time-Stratified Analyses**

|                                   | First 5 Years of Follow-up <sup>a</sup> |               |                                                        | Latter Follow-up <sup>b</sup> |               |                                                        |
|-----------------------------------|-----------------------------------------|---------------|--------------------------------------------------------|-------------------------------|---------------|--------------------------------------------------------|
|                                   | Cohort<br>N (%)                         | Case<br>N (%) | Multivariable-<br>Adjusted <sup>a</sup><br>HR (95% CI) | Cohort<br>N (%)               | Case<br>N (%) | Multivariable-<br>Adjusted <sup>a</sup><br>HR (95% CI) |
| <b>Overall Cancer<sup>c</sup></b> |                                         |               |                                                        |                               |               |                                                        |
| Regular Ranitidine Use            |                                         |               |                                                        |                               |               |                                                        |
| No                                | 450,360 (98.1)                          | 18,179 (97.7) | Reference                                              | 428,647 (98.1)                | 7,486 (98.1)  | Reference                                              |
| Yes                               | 8,844 (1.9)                             | 422 (2.3)     | 1.07 (0.97, 1.18)                                      | 8,314 (1.9)                   | 143 (1.9)     | 0.86 (0.73, 1.01)                                      |
| Ranitidine vs Omeprazole          |                                         |               |                                                        |                               |               |                                                        |
| Regular Omeprazole Use            | 26,139 (76.5)                           | 1,374 (78.3)  | Reference                                              | 24,401 (73.4)                 | 533 (80.6)    | Reference                                              |
| Regular Ranitidine Use            | 8,024 (23.5)                            | 381 (21.7)    | 0.99 (0.88, 1.11)                                      | 7,553 (23.6)                  | 128 (19.4)    | 0.86 (0.73, 1.01)                                      |

<sup>a</sup> Defined by the first 5 years of each participant's follow-up (such that all participants censored at 5 years of follow-up)

<sup>b</sup> Includes the follow-up beyond the first 5 years of each participant's follow-up, such that all participants with more than 5 years of follow-up are entered into the models at 5 years and followed for the remainder of their follow-up

## Supplemental Methods

Minimally-adjusted models were adjusted for age, sex, and race, with multivariable models further adjusted for income, body mass index (BMI), smoking status, pack-years smoked, alcohol intake, physical activity, and diabetes (detailed in table footnotes). Covariates were assessed at baseline, at the time of exposure assessment. We have largely used a complete case approach, whereby analyses only include participants with complete data (ie, those missing covariate data are excluded). However, for those variables for whom data are missing for >5% of the study population (household income and physical activity), we have alternatively used a missing indicator. This hybrid approach avoids the issue of non-convergence due to small cells (resulting from small numbers missing for most covariates), but also avoids dropping large groups due to missing data for a particular covariate. Models of each cancer site were adapted to additionally include covariates specific to that site; thus, sample size differs slightly across analyses.

Sensitivity analyses were conducted with regard to covariate selection in site-specific analyses. As information on family history of cancer was only available for certain cancer sites (colorectum, lung, breast, prostate), we conducted sensitivity analyses of these sites adjusting for site-specific family history. Results were unchanged, thus family history variables were not included in final models. For breast cancer, sensitivity analyses were conducted additionally adjusting for age at menopause (as determined at baseline); as effect estimates did not materially change, we have not included this covariate in the analyses. Lastly, in models of kidney cancer, we were unable to adjust for pre-existing kidney disease (indicated by renal/kidney failure, polycystic kidney disease, or transplant), given the small number of persons with these conditions; thus, we conducted a sensitivity analysis excluding these persons from analyses. Results did not differ from the main model, and thus persons with these conditions were not excluded
